# Supplementary material for: Low ketolytic enzyme levels in tumors predict ketogenic diet responses in cancer cell lines in vitro and in vivo
Source: PubMed Central journal article supplement (PMC5880499; doi:10.1194/jlr.m082040), 2018-02-05
Supplement: 10.1194_M082040_jlr.M082040-1.pdf [file 10.1194_M082040_jlr.M082040-1.pdf]

**SUPPLEMENTAL INFORMATION:**

**Low ketolytic enzyme levels in tumors predict ketogenic diet responses  
in cancer cell lines in vitro and in vivo**

Jie Zhang<sup>1, 5#</sup>, Ping-Ping Jia<sup>2#</sup>, Qing-Le Liu<sup>3#</sup>, Ming-Hua Cong<sup>4</sup>, Yun Gao<sup>5</sup>, Han-Ping Shi<sup>2\*</sup>,  
Wei-Nan Yu<sup>1\*</sup>, Ming-Yong Miao<sup>5\*</sup>

*<sup>1</sup>Department of Endocrinology, Huai'an Hospital Affiliated to Xuzhou Medical University, and Huai'an Second People's Hospital, Huai'an 223002, Jiangsu, China. <sup>2</sup>Department of Gastrointestinal Surgery / Clinical Nutrition, Beijing Shijitan Hospital, Capital Medical University, Beijing 100038, China. <sup>3</sup>Department of Hyperbaric Oxygen Therapy, The First Affiliated Hospital of The Second Military Medical University, Changhai Hospital, Shanghai 200433, China. <sup>4</sup>Department of Comprehensive Therapy, Cancer Hospital of Chinese Academy of Medical Sciences, Beijing 100021. <sup>5</sup>Department of Biochemistry and Molecular Biology, The College of Basic Medical Sciences, The Second Military Medical University, Shanghai 200433, China.*

**Table S1. The exact composition of the diets**

|                          | <b>Standard diet (%)</b>                 | <b>Ketogenic diet (%)</b> |
|--------------------------|------------------------------------------|---------------------------|
| <b>Protein</b>           | 19.0                                     | 18.2                      |
| <b>Fat</b>               | 4.0                                      | 62.8                      |
| <b>Carbohydrate</b>      | 50.0                                     | 2.6                       |
| <b>Fiber</b>             | 5.0                                      | 4.8                       |
| <b>Ash content</b>       | ≤8.0                                     | 5.2                       |
| <b>Water content</b>     | <10.0                                    | <10.0                     |
| <b>others</b>            | vitamins <sup>1</sup> and trace elements |                           |
| <b>Calories per gram</b> | 6.49kcal                                 | 3.12kcal                  |

Note: <sup>1</sup>The exact composition of vitamins are shown in table S2.

**Table S2. The exact composition of the vitamins**

|                  | <b>Value</b> | <b>Unit</b> |
|------------------|--------------|-------------|
| Vitamin A        | 13800        | 1U/kg       |
| Vitamin B12      | 19           | mcg/kg      |
| Ascorbic Acid    | 0            | mg /kg      |
| Vitamin D3       | 1900         | 1U/kg       |
| Vitamin E        | 220          | 1U/kg       |
| Vitamin K3       | 2            | mg/kg       |
| Biotin           | 0.38         | mg /kg      |
| Choline          | 1790         | mg /kg      |
| Folic acid       | 3.8          | mg/kg       |
| nicotinic acid   | 57.1         | mg /kg      |
| Pantothenic acid | 28           | mg /kg      |
| Pyridoxine       | 11           | mg /kg      |
| Rinoflavin       | 11.5         | mg /kg      |
| Thiamine         | 11.4         | mg/kg       |

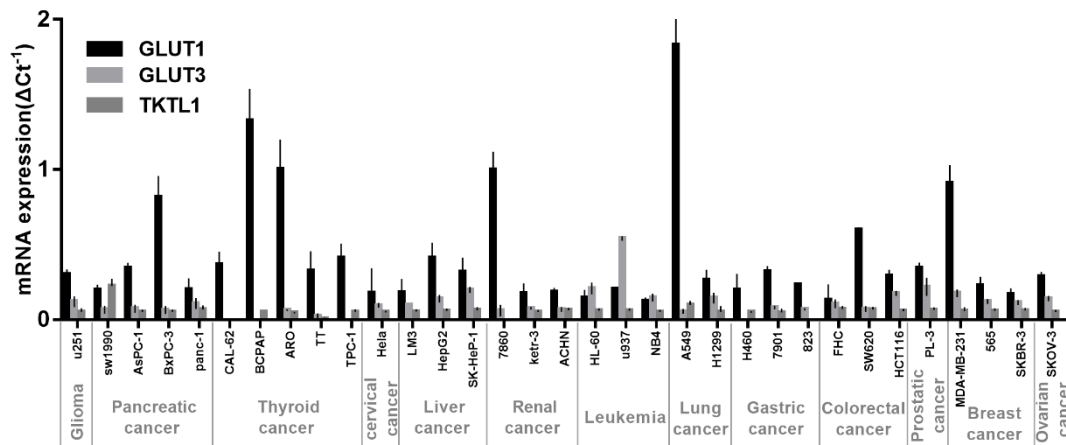

**Fig. S1.** The mRNA expression levels of relevant glycometabolic markers in 33 cancer cells by qRT-PCR.

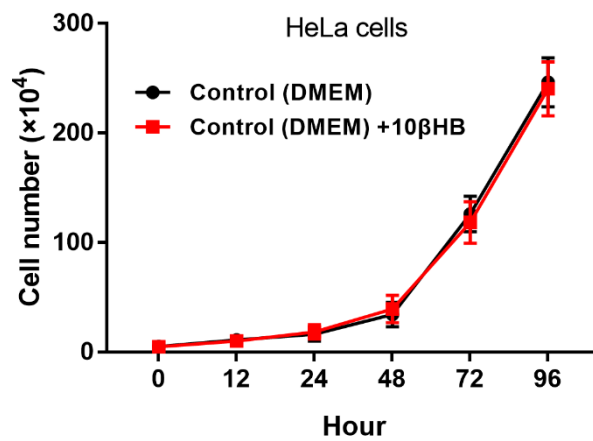

**Fig. S2.** Supplementation of control medium with 10 mMβHB does not affect proliferation of HeLa cells.

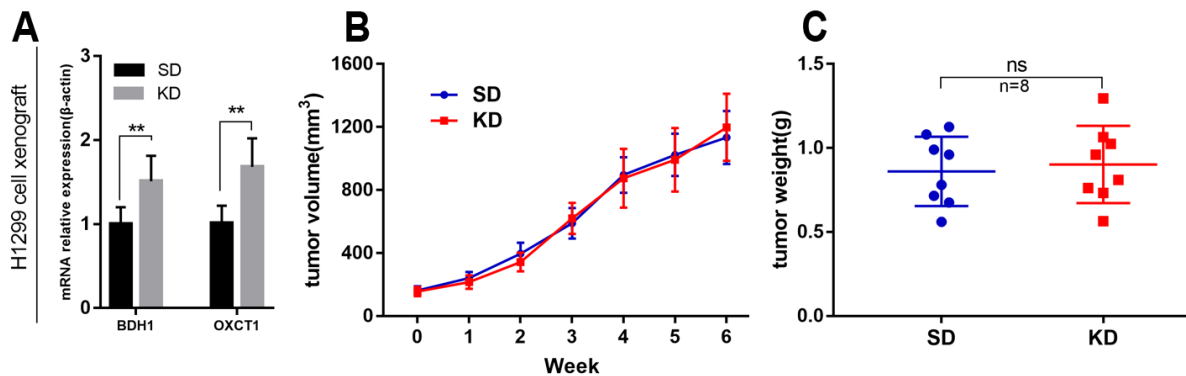

**Fig. S3.** KD could not inhibit tumor growth in H1299 cell xenografted nude mice. (A) The expression levels of BDH1 and OXCT1 mRNA in xenograft tumors by qRT-PCR. The relative quantitative expression was calculated by the  $2^{-\Delta\Delta C_t}$  method.  $**p < 0.01$  compared with the control. (B) Tumor growth of xenografted nude mice. (C) Tumor weight of xenografted nude mice.

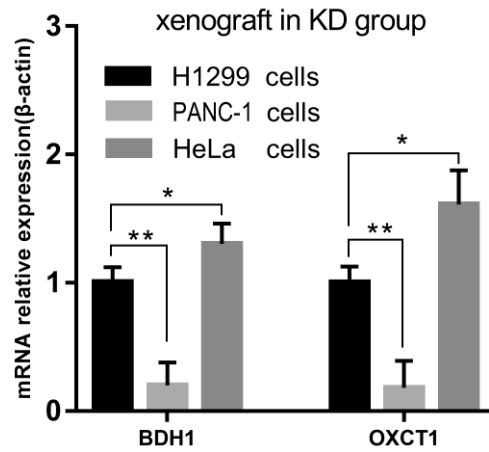

**Fig. S4. The expression levels of BDH1 and OXCT1 in PANC-1, H1299 and HeLa cell xenografts in KD group.** The BDH1 and OXCT1 expression levels in H1299 cell xenograft were lower than the ones in HeLa cell (\* $P < 0.05$ ), but significantly higher than the ones in PANC-1 xenograft (\*\* $P < 0.01$ ).
